# Supplementary material for: Salmonella-induced SIRT1 and SIRT3 are crucial for maintaining the metabolic switch in bacteria and host for successful pathogenesis
Source: eLife. 2024 Dec 18;13:RP93125. doi: 10.7554/eLife.93125 (PMC11655064; doi:10.7554/eLife.93125)
Supplement: Figure 1—figure supplement 1—source data 1. [file elife-93125-fig1-figsupp1-data1.xlsx]

## Sheet: Sheet1
		Fig. S1
	C	UI	STM		UI	STM		D	UI	STM		UI	STM
		1	0.951481		1	0.819349			1	31.9266		1	18.6295
		1	0.556525		1	0.0348725			1	18.8304		1	5.44864
			0.377761		1	0.403253						1	4.05028
			0.141089		1	0.262828
			Sirt1			Sirt3				Sirt1			Sirt3
	E	Unpolarized	M1	M2
		6.28	12	50
		4.4	10	55
		65	66.6	66
		32	47.6	48
		49	33.33
			9.52
	F	Unpolarized	M1	M2		Unpolarized	M1	M2
		83.2533	161.58	101.647		43.4805	45.507	37.5841
		92.933	136.89	107.028		43.7015	39.9219	79.3483
		100.623	155.2	114.802		43.4904		82.3238
