# Supplementary material for: Salmonella-induced SIRT1 and SIRT3 are crucial for maintaining the metabolic switch in bacteria and host for successful pathogenesis
Source: eLife. 2024 Dec 18;13:RP93125. doi: 10.7554/eLife.93125 (PMC11655064; doi:10.7554/eLife.93125)
Supplement: Figure 2—figure supplement 1—source data 1. [file elife-93125-fig2-figsupp1-data1.xlsx]

## Sheet: Sheet1
	Fig. S2
A	Untransfected	Scrambled	shSIRT1 C4	shSIRT1 C12
	1	0.00222564	0.55583	0.000413425
	1	0.00332347	0.156213	1.05705
		0.00185997		0.0015
		2.64547
B	Untransfected	Scrambled	shSIRT3 E8	shSIRT3 E12
	1	0.00222564	0.195363	0.0402997
	1	0.00332347	0.321843	0.238682
	1	0.00185997
	1	2.64547
